# Supplementary material for: An attempt to confirm the contribution to ORR activity of different N-species in M-NC (M = Fe, Co, Ni) catalysts with XPS analysis
Source: Royal Society of Chemistry journal article supplement (doi:10.1039/d2cc06375a), 2023-01-01
Supplement: d2cc06375a1.pdf [file d2cc06375a1.pdf]

## Electronic Supplementary Information

### An attempt to confirm the contribution to ORR activity of different N-species in M-NC (M=Fe, Co, Ni) catalysts with XPS analysis

Zhuxin Li, <sup>a</sup> Hongquan Yu, <sup>b</sup> Yong Zhang, <sup>a</sup> Danyang Wu, <sup>b</sup> Yunxiang Bai, <sup>a</sup> Shuhong Liu, <sup>a</sup>  
and Hong Zhao <sup>\*a</sup>

<sup>[a]</sup> Key laboratory of metal-air new energy batteries of Liaoning province, Dalian Jiaotong University, Dalian 116028, China

<sup>[b]</sup> Department of Physics, Dalian Maritime University, Dalian 116026, Liaoning, China

\*Corresponding author.

E-mail address: zhaohong@djtu.edu.cn (Hong Zhao)

### Materials

The specific preparation process of Co-NC and Ni-NC catalysts is as follows: Take the mass of  $C_4H_6CoO_4$  and  $Ni(NO_3)_2$  to be 1.5 g and 2.0 g respectively, dissolve the medicine in 40 mL N,N-dimethylformamide respectively. Add 100 mg of highly conductive graphene. Add 4.8 g of PVP. Strong stirring to prepare viscous and drawable precursor solution; the distance between the control nozzle and the receiving plate is between 10~15 cm. The applied voltage is about 18~22 KV. The angle between the nozzle and the horizontal is adjusted to 15°. The precursors with 3D sponge-like nanofibrous structures were prepared and then dried at 80 °C for 8 h. The dried fibers were transferred to a tube furnace for pre-oxidation experiments. The fibers are calcined in air to 300 °C and cooled to room temperature. Then they were transferred to ammonia gas and heated to 600 °C, 700 °C, 800 °C, and 900 °C for heat treatment. They are respectively recorded as Co-NC600, Co-NC700, Co-NC800, Co-

NC900; Ni-NC600, Ni-NC700, Ni-NC800, Ni-NC900.

## **Material characterization**

Field Emission Scanning Electron Microscope (FE-SEM, Hitachi S-4800, Japan) with an acceleration voltage of 30 kV was used to characterize the morphology of a catalyst. X-ray photoelectron spectroscopy (XPS) was performed on a VG Multilab 2000 (Thermo Electron Corp, MA) X-ray photoelectron spectrometer with a vacuum of  $10^{-7}$  Pa to remove a large number of impurity species adsorbed on the surface of the sample. The excitation source of XPS was Al K $\alpha$  rays and spectral data were corrected with C 1s binding energy.

## **Electrochemical characterization**

All electrochemical measurements were performed in a three-electrode system of an electrochemical workstation (PGSTAT302 N, Ecochemie Co, Netherlands) at 25 °C with a loading the catalyst of  $0.2 \text{ mg cm}^{-2}$ . In the measurements, the glassy carbon electrode with a diameter of 5 mm was used as the working electrode, the saturated calomel electrode was used as the reference electrode, and the platinum mesh electrode with a side length of 2 cm was used as the auxiliary electrode. High-purity nitrogen and oxygen with a purity of 99.5% were used as the test gas conditions. ORR stability was investigated by cyclic voltammetry at a scan rate of  $50 \text{ mV s}^{-1}$  in a 0.1 M KOH electrolyte solution over a potential range between -1 and 0.2 V and linear sweep voltammetry (LSV) curves were recorded at a scan rate of  $10 \text{ mV s}^{-1}$  in an O<sub>2</sub> saturated electrolyte solution at rotation rates of 1600 rpm.

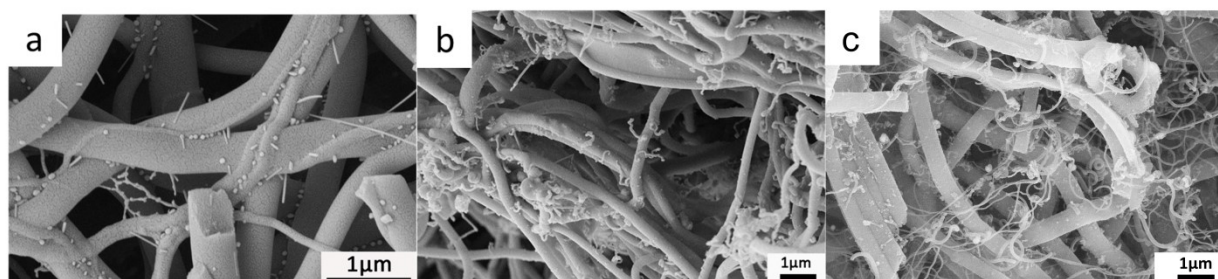

**Fig. S1.** SEM images of the (a) Fe-NC600 catalysts; (b) Fe-NC700 catalysts; (c) Fe-NC900 catalysts.

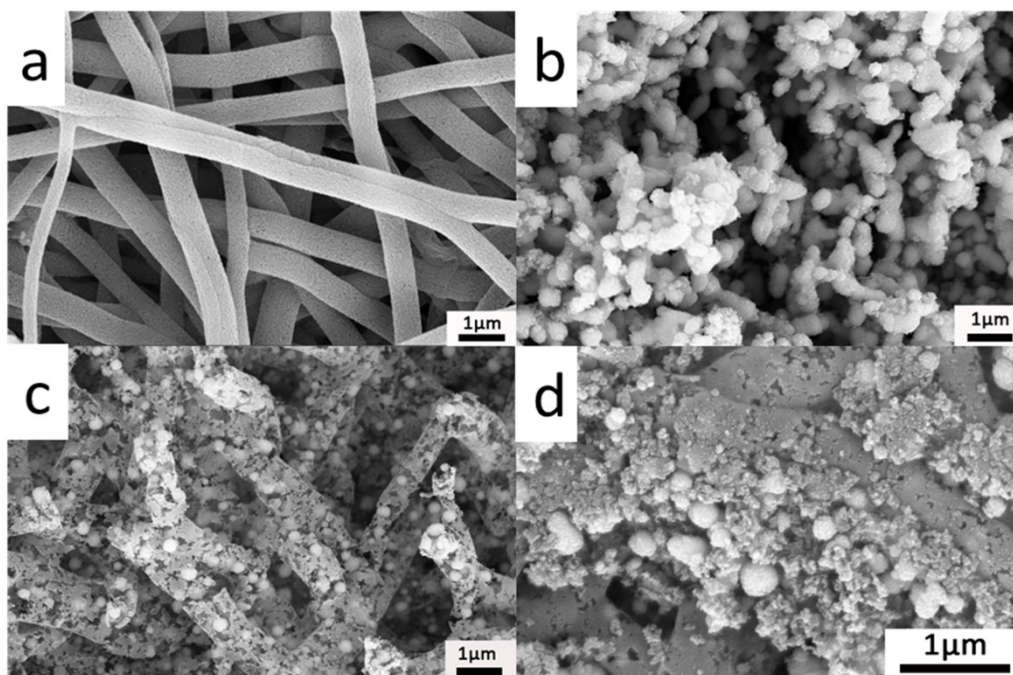

**Fig. S2.** SEM images of the (a) Co-NC600 catalysts; (b) Co-NC700 catalysts; (c) Co-NC800 catalysts; (d) Co-NC900 catalysts.

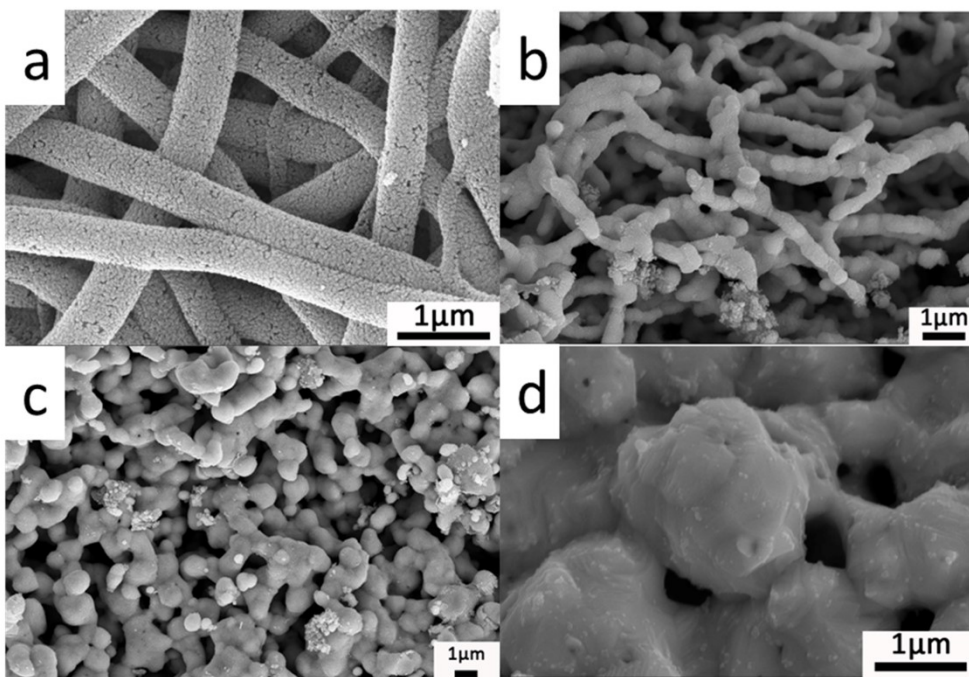

**Fig. S3.** SEM images of the (a) Ni-NC600 catalysts; (b) Ni-NC700 catalysts; (c) Ni-NC800 catalysts; (d) Ni-NC900 catalysts.

**Table S1.** Linear fitting equation between the content of different N-species in M-NC(M=Co, Ni) catalysts and the corresponding ORR half-wave potential.

| Catalysts | Equation                 | Solution             |
|-----------|--------------------------|----------------------|
| Co-NC600  | $15\%x+49\%h+36\%i=0.66$ | $x=0.91$             |
| Co-NC700  | $30\%x+13\%y+57\%z=0.86$ | $y=1.04$             |
| Co-NC800  | $30\%x+17\%y+53\%z=0.87$ | $z=0.79$             |
| Co-NC900  | $32\%x+20\%y+48\%z=0.88$ | $h=0.44$<br>$i=0.85$ |
| Ni-NC600  | $33\%x+16\%y+51\%h=0.66$ | $x=0.84$             |
| Ni-NC700  | $34\%x+15\%y+51\%z=0.81$ | $y=1.18$             |
| Ni-NC800  | $51\%x+49\%z=0.76$       | $z=0.68$             |
| Ni-NC900  | $45\%x+55\%z=0.75$       | $h=0.38$             |

**Table S2.** The influence coefficient of different N-species in the M-NC catalysts on the ORR performance of the catalysts and the statistical table of the highest half-wave potential value.

|       | pyridinic-N(x) | M-N <sub>x</sub> (y) | graphitic-N(z) | pyrrolic-N(h) | E <sub>1/2</sub> (highest) |
|-------|----------------|----------------------|----------------|---------------|----------------------------|
| Fe-NC | 0.92           | 1.09                 | 0.83           | 0.46          | 0.89                       |
| Co-NC | 0.91           | 1.04                 | 0.79           | 0.44          | 0.88                       |
| Ni-NC | 0.84           | 1.18                 | 0.68           | 0.38          | 0.81                       |

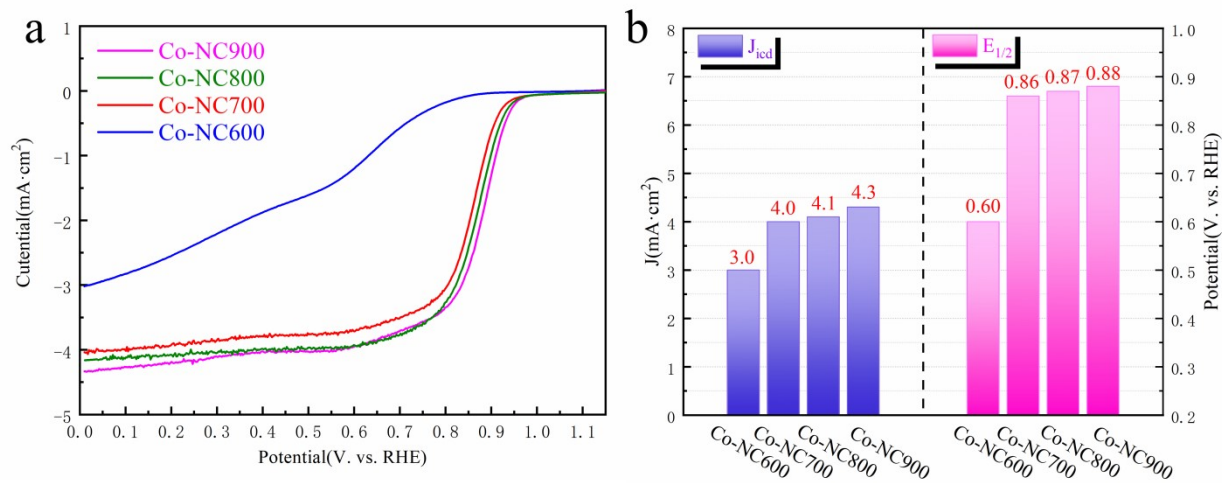

**Fig. S4.** (a) LSV curve and (b) corresponding half-wave potential and current density of Co-NC catalysts at different calcination temperatures.



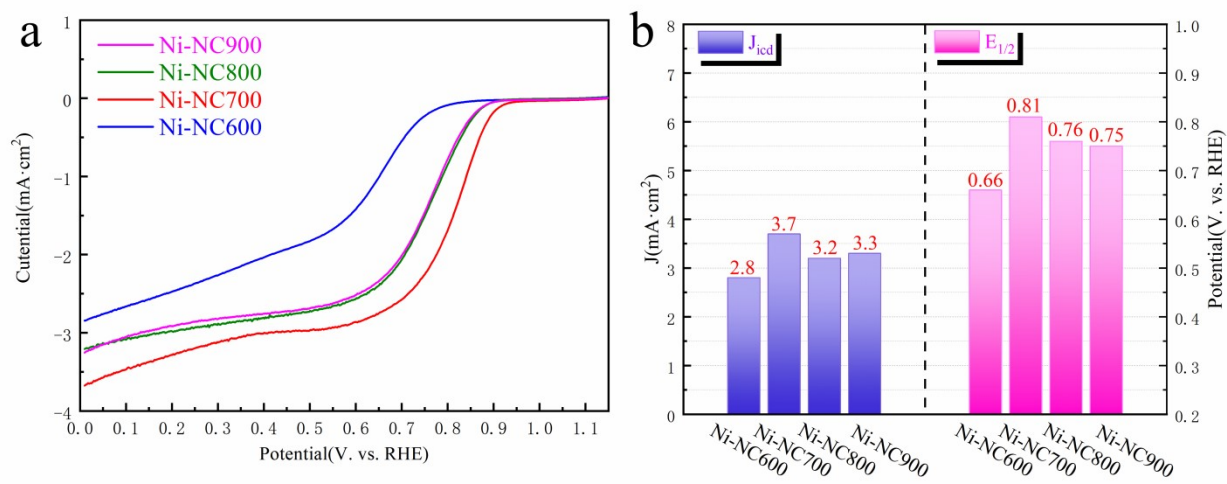

**Fig. S5.** (a) LSV curve and (b) corresponding half-wave potential and current density of Ni-NC catalysts at different calcination temperatures.

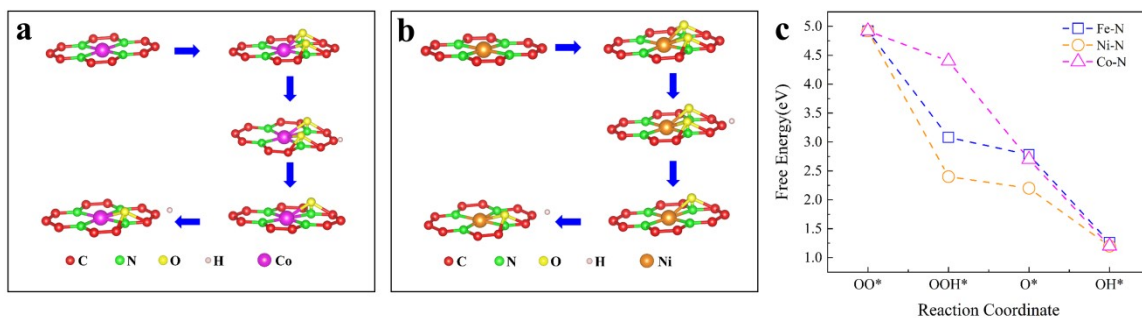

**Fig. S6.** (a) First-principles calculation simulation diagram of Co-Nx as an ORR activity center; (b) First-principles calculation simulation diagram of Ni-Nx as an ORR activity center; (c) First-principles calculations of free energy of Fe-Nx, Co-Nx and Ni-Nx as ORR active center.
